# Supplementary material
Source: PubMed Central journal article supplement (PMC4096365)
Supplement: 3e9fd06436ec511273c1f7741e1f57bb_genetics.114.163279-2.pdf [file 3e9fd06436ec511273c1f7741e1f57bb_genetics.114.163279-2.pdf]

A

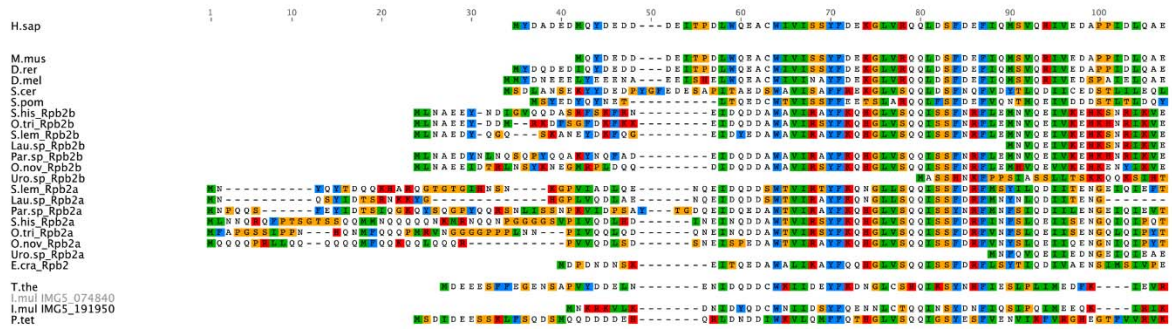

B

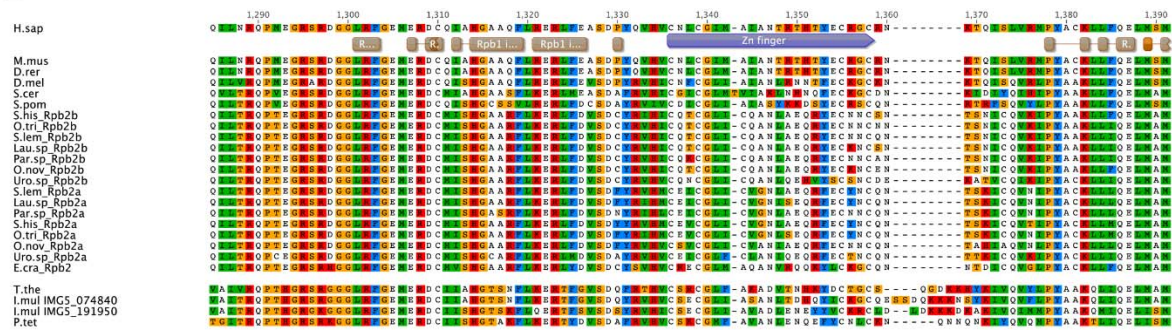

**Figure S4 Clustal-W Multiple sequence alignment of Rpb2 proteins.** A snapshot of multiple sequence alignment for A) N-terminus of Rpb2 showing Rpb2-a specific extension, and B) C-terminal domain illustrating the high sequence conservation of Cysteins (C) in Zinc-finger binding domain (blue) and Rpb1 binding sites (amber) across all species.
