# Supplementary material
Source: PubMed Central journal article supplement (PMC4096365)
Supplement: 5b0e09191eb5bb8f6275baf437997223_genetics.114.163279-4.pdf [file 5b0e09191eb5bb8f6275baf437997223_genetics.114.163279-4.pdf]

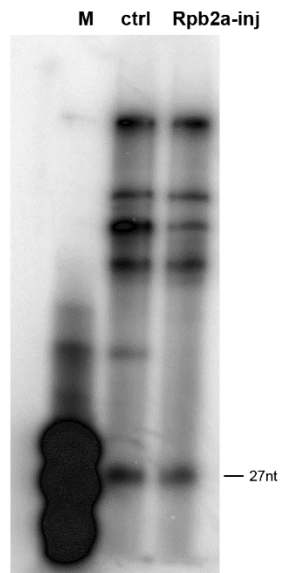

**Figure S7** *Rpb2-a* knockdown does not affect the levels of 27nt small RNAs. g-P32 end labeled RNA from 18hr control (ctrl) and *Rpb2-a* KD cells (*Rpb2a-inj*) (Figure 4A) analyzed on a 15% Urea-PAGE gel.
