# Supplementary material
Source: PubMed Central journal article supplement (PMC4096365)
Supplement: 19d7703011beb6ac03719d5717286732_genetics.114.163279-5.pdf [file 19d7703011beb6ac03719d5717286732_genetics.114.163279-5.pdf]

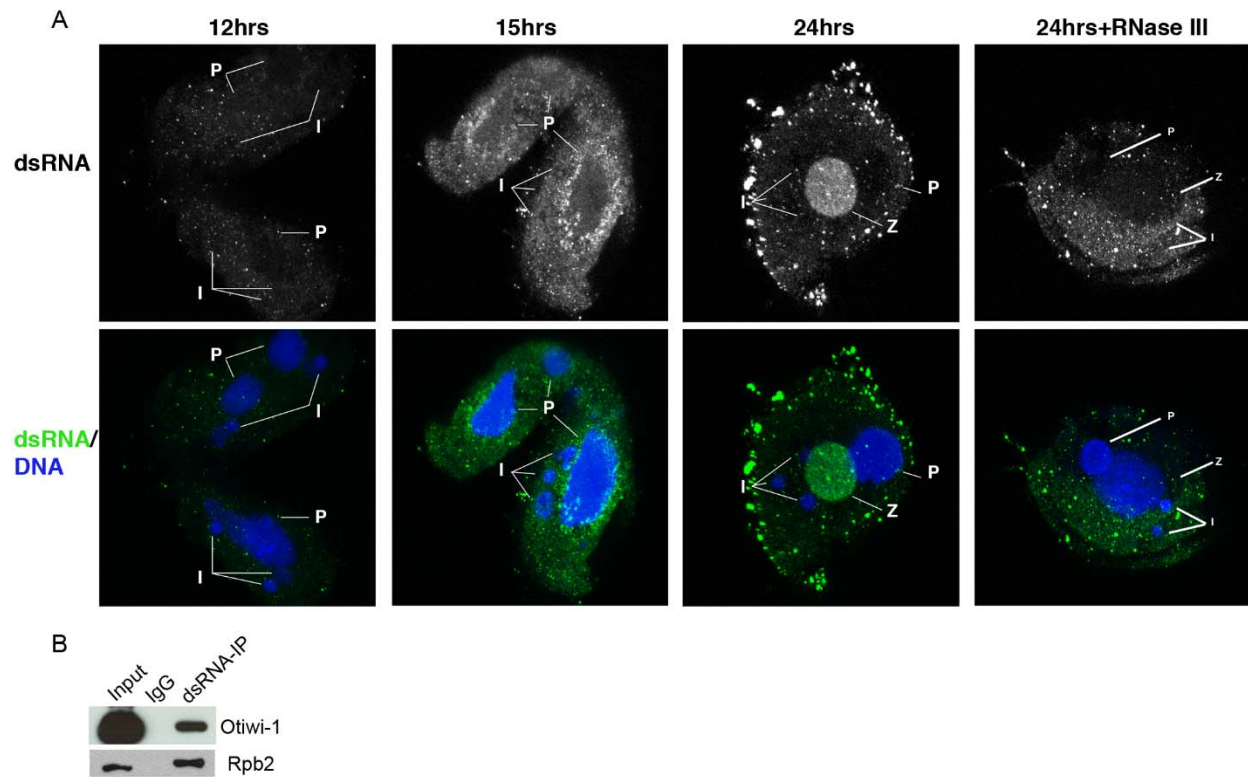

**Figure S3 dsRNA localization during development in *Oxytricha*.** A) Cells were isolated and fixed at indicated times and immunostained using dsRNA-specific antibody (green) and DNA (blue). The nuclear signal is sensitive to RNase III, indicating the specificity of the antibody. B) Western blot analysis from 15hr cell lysates for Rpb2 and Otiwi-1 in immunoprecipitated lysates using dsRNA-specific antibody (dsRNA-IP) or IgG as a negative control.
