# Supplementary material
Source: PubMed Central journal article supplement (PMC4096365)
Supplement: a25b6be36cfc0c06d9e7fbdb679ad01c_genetics.114.163279-8.pdf [file a25b6be36cfc0c06d9e7fbdb679ad01c_genetics.114.163279-8.pdf]

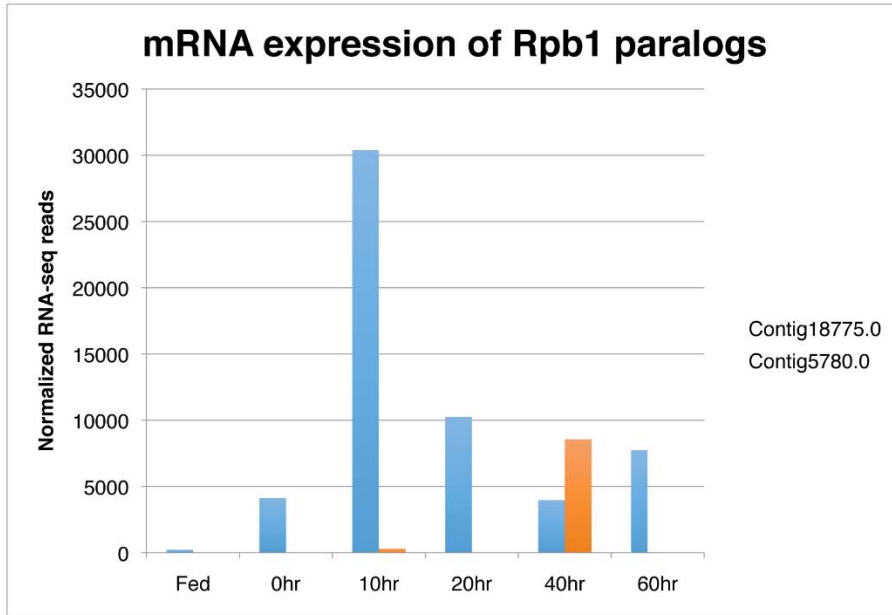

**Figure S5 mRNA expression of Rpb1 paralogs throughout development.** Normalized RNA-seq reads for Contig 18775.0 and Contig 5780.0, the two Rpb1 paralogs during *Oxytricha* development.
