# Supplementary material
Source: PubMed Central journal article supplement (PMC4096365)
Supplement: aa6e9516507d5f1e72b95e5fa25f2ace_genetics.114.163279-9.pdf [file aa6e9516507d5f1e72b95e5fa25f2ace_genetics.114.163279-9.pdf]

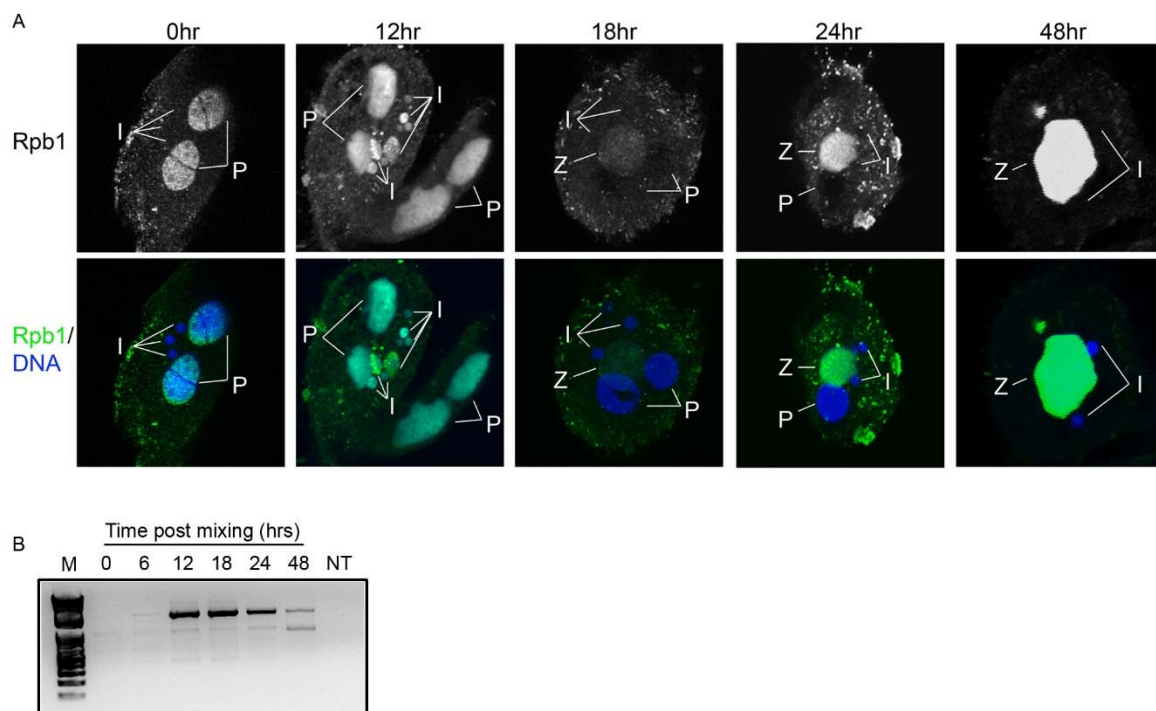

**Figure S1 Rpb1 localization and lncRNA expression during development in *Oxytricha trifallax*:** A) Cells isolated at indicated developmental time points were fixed and analyzed by indirect immunofluorescence using Anti-Rpb1 antibody (green), which recognizes total and active (serine-2 phosphorylated) forms of Rpb1, and staining for DNA (DAPI, blue). B) RT-PCR to identify lncRNAs corresponding to TEBP-a antisense-strand, as described in ref.13.
