# Supplementary material
Source: PubMed Central journal article supplement (PMC4096365)
Supplement: c264871c645dcf3aa9916501fe4d9b29_genetics.114.163279-6.pdf [file c264871c645dcf3aa9916501fe4d9b29_genetics.114.163279-6.pdf]

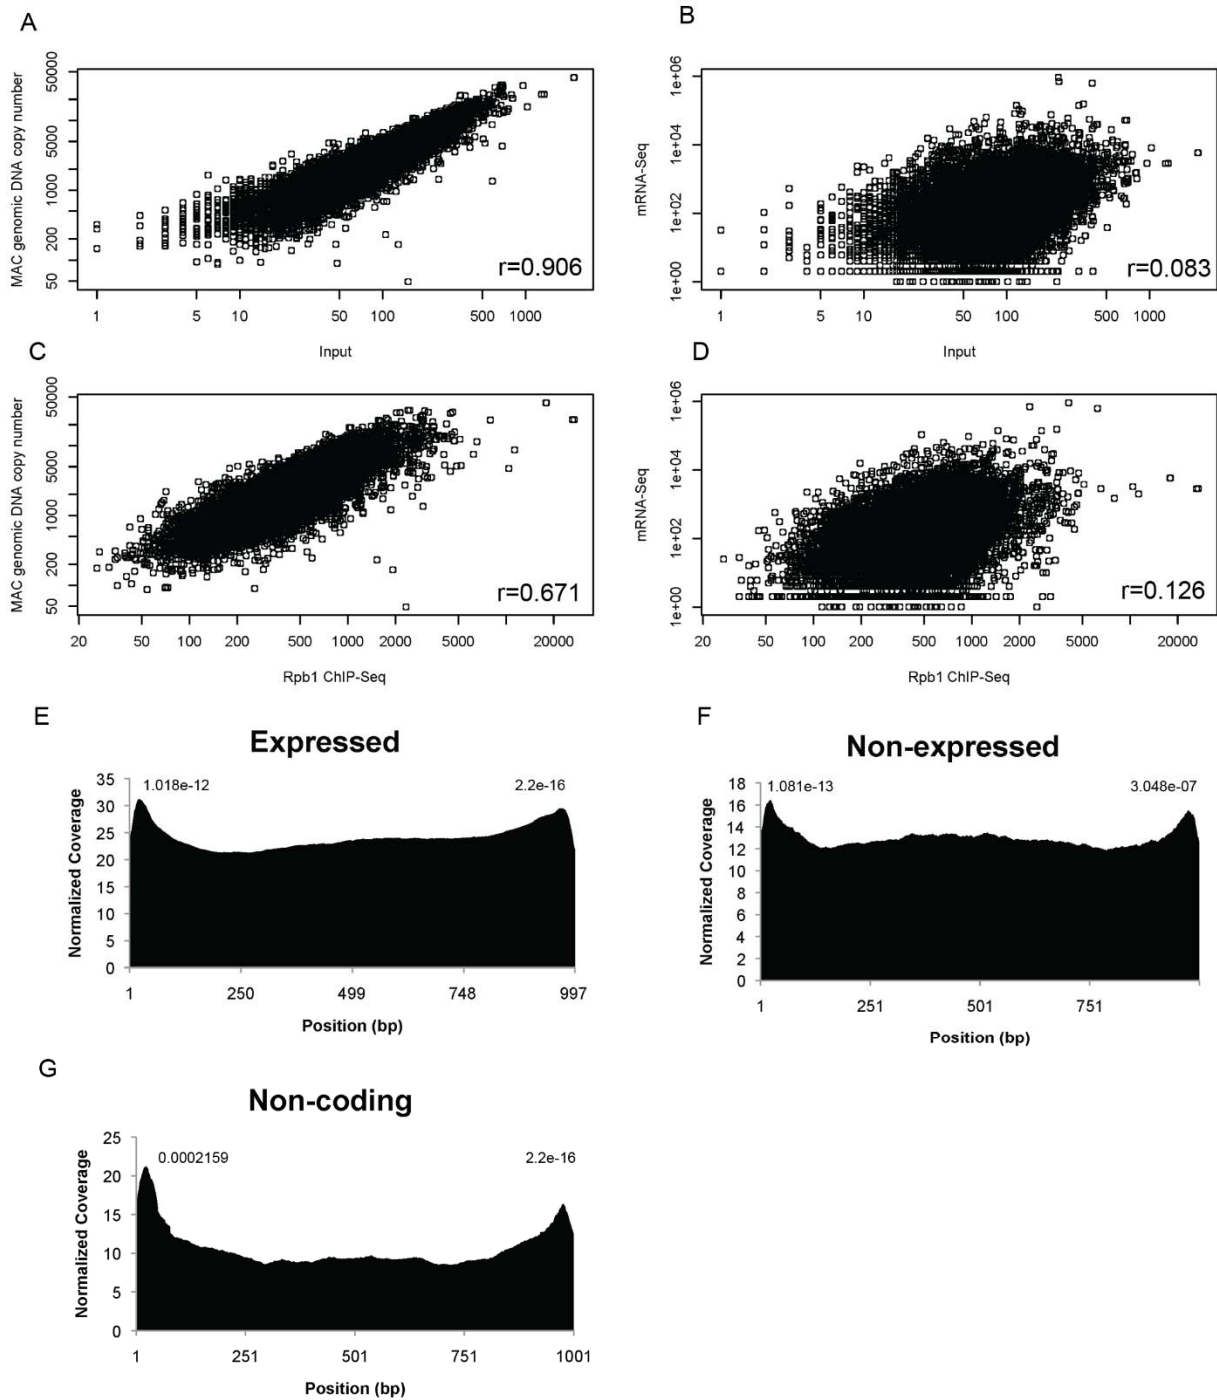

**Figure S2 Genome-wide mapping for Rpb1 ChIP at 12hrs.** Mapping correlation between Input (A,B) or Rpb1 ChIP (C,D) versus genomic DNA copy number or mRNA-seq. (E,F,G) Normalized coverage for Rpb1 ChIP compared to expressed (E), non-expressed (F) and non-coding contigs (G) at 12hrs post mating. The reads are normalized to 1kb length. The numbers over peaks indicate p-values from a t-test comparing the mapping over 5' and 3' regions versus the middle of MAC contigs.
